# Supplementary material for: Intention to Pay for HPV Vaccination among Women of Childbearing Age in Vietnam
Source: MDPI journal article supplement (doi:10.3390/ijerph17093144), 2020-04-30
Supplement: s1 [file s1]

Table S1. Knowledge of cervical cancer and HPV vaccine questions.

| Question                                                                 | True                                      | False | Unknown/ No Response |
|--------------------------------------------------------------------------|-------------------------------------------|-------|----------------------|
| <b>Cervical cancer knowledge</b>                                         |                                           |       |                      |
| Total score: 7                                                           |                                           |       |                      |
| Cervical cancer is an inherited disease                                  | 0                                         | 1     | 0                    |
| Cervical cancer is caused by a virus                                     | 1                                         | 0     | 0                    |
| Cervical cancer is an infectious disease                                 | 0                                         | 1     | 0                    |
| <b>Population at high cervical cancer risk</b>                           |                                           |       |                      |
| Women who have given birth                                               | 1 point if pointing to at least an answer |       |                      |
| Elderly people                                                           |                                           |       |                      |
| People with multiple sexual partners                                     |                                           |       |                      |
| Women with poor (gynecological) hygiene behaviors                        |                                           |       |                      |
| <b>Signs of cervical cancer</b>                                          |                                           |       |                      |
| Abnormal vaginal bleeding                                                | 1 point if pointing to at least an answer |       |                      |
| Unusual discharge from the vagina                                        |                                           |       |                      |
| Urinary incontinence                                                     |                                           |       |                      |
| Bleeding after intercourse                                               |                                           |       |                      |
| Pain during sexual intercourse                                           |                                           |       |                      |
| Back pain                                                                |                                           |       |                      |
| Cervical cancer can be prevented                                         | 0                                         | 1     | 0                    |
| HPV vaccine is one of the most effective ways to prevent cervical cancer | 0                                         | 1     | 0                    |
| <b>Knowledge of HPV vaccine</b>                                          |                                           |       |                      |
| Total score: 5                                                           |                                           |       |                      |
| HPV vaccines include 3 shots in Vietnam                                  | 1                                         | 0     | 0                    |
| HPV vaccines should be taken at ages 9–26 years                          | 1                                         | 0     | 0                    |
| Women who do not engage in sex can still get vaccinated                  | 1                                         | 0     | 0                    |
| Sexually active women should get an HPV test before being vaccinated     | 1                                         | 0     | 0                    |
| <b>Side effect of HPV vaccines</b>                                       |                                           |       |                      |
| Redness or swelling                                                      | 1 point if pointing to at least an answer |       |                      |
| Headache                                                                 |                                           |       |                      |
| Fever (mild or moderate)                                                 |                                           |       |                      |
